# Supplementary material for: Nitrogen-doped carbon dots enhanced seedling growth and salt tolerance with distinct requirements of excitation light
Source: Royal Society of Chemistry journal article supplement (doi:10.1039/d3ra01514a), 2023-01-01
Supplement: d3ra01514a1.pdf [file d3ra01514a1.pdf]

## Electronic Supplementary Information (ESI)

### Nitrogen-doped carbon dots enhanced seedling growth and salt tolerance with distinct requirements of excitation light

Xiuli Jing,<sup>a</sup> Yankai Liu,<sup>a</sup> Xuzhe Liu,<sup>b</sup> Xiao-Fei Wang,<sup>a</sup> Chunxiang You,<sup>a</sup> Dayong Chang,<sup>\*c</sup> and  
Shuai Zhang<sup>\*b</sup>

<sup>a</sup> State Key Laboratory of Crop Biology, Shandong Green Fertilizer Technology Innovation Center, Apple technology innovation center of Shandong Province, College of Horticulture Science and Engineering, Shandong Agricultural University, Taian, Shandong, 271018, China.

<sup>b</sup> Key Laboratory of Agricultural Film Application of Ministry of Agriculture and Rural Affairs, College of Chemistry and Material Science, Shandong Agricultural University, Taian, Shandong, 271018, China.

<sup>c</sup> Yantai Goodly Biological Technology Co., Ltd, Yantai, Shandong, China.

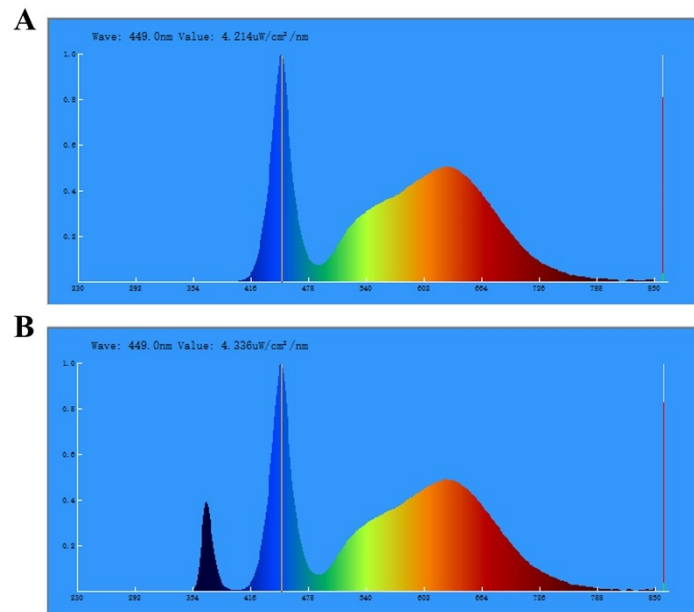

**Fig. S1** (A) Seedlings growth light spectrum without UV-A light. (B) Seedlings growth light spectrum containing UV-A light ( $\lambda_{\text{max}} = 365$  nm).

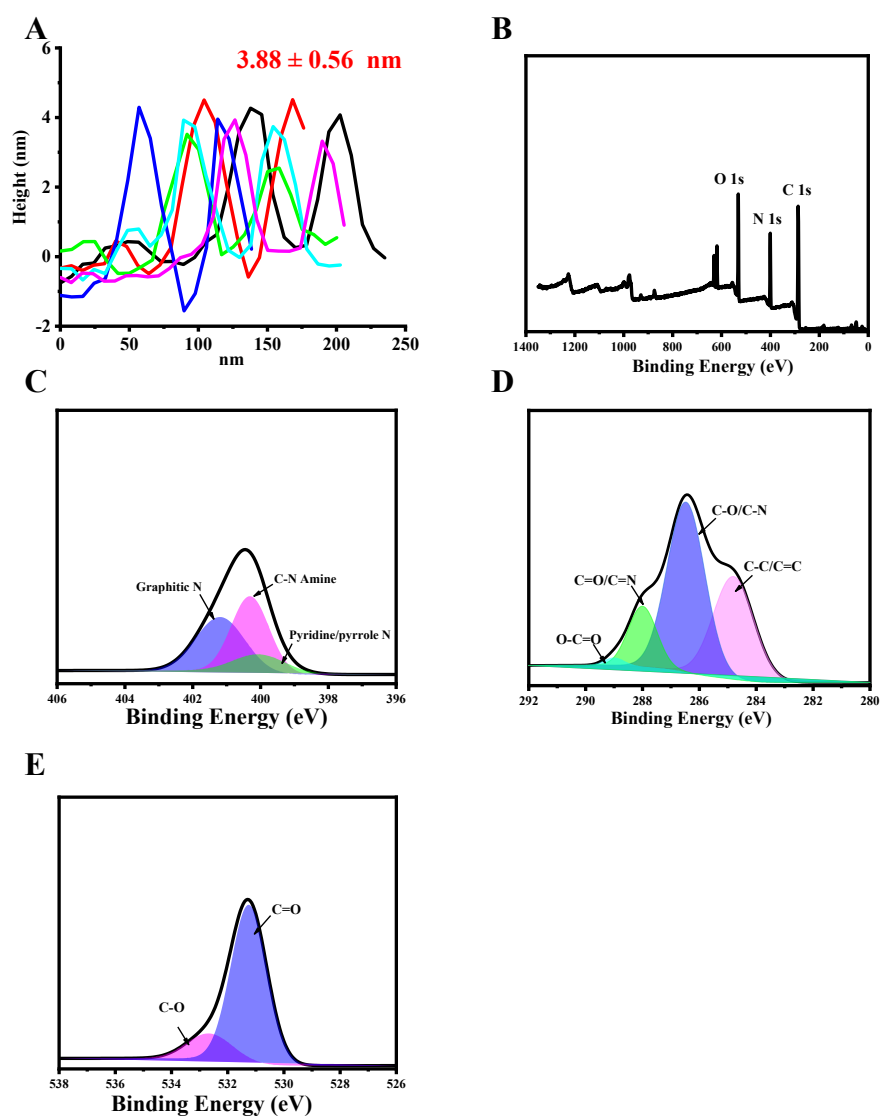

**Fig. S2** (A) The height of N-CD. (B) XPS full scan spectrum of N-CD. (C-E) High-resolution XPS spectra of N<sub>1s</sub> (C), C<sub>1s</sub> (D), O<sub>1s</sub> (E) of N-CD.

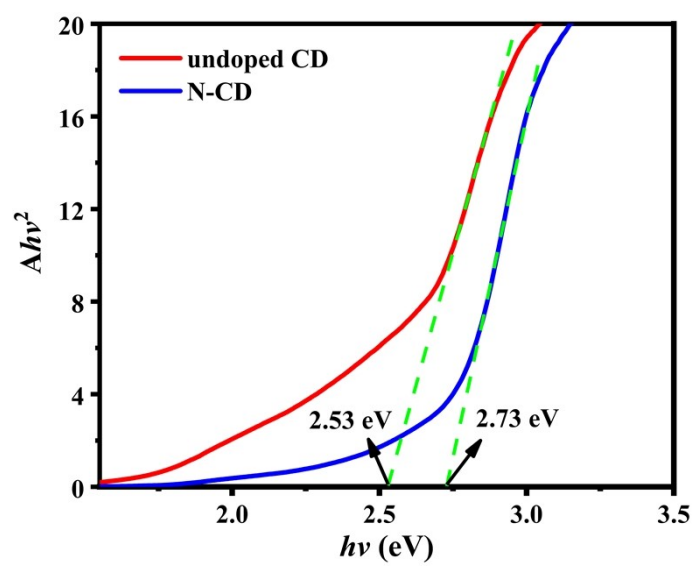

**Fig. S3** The optical band gap of the N-CD and undoped CD.

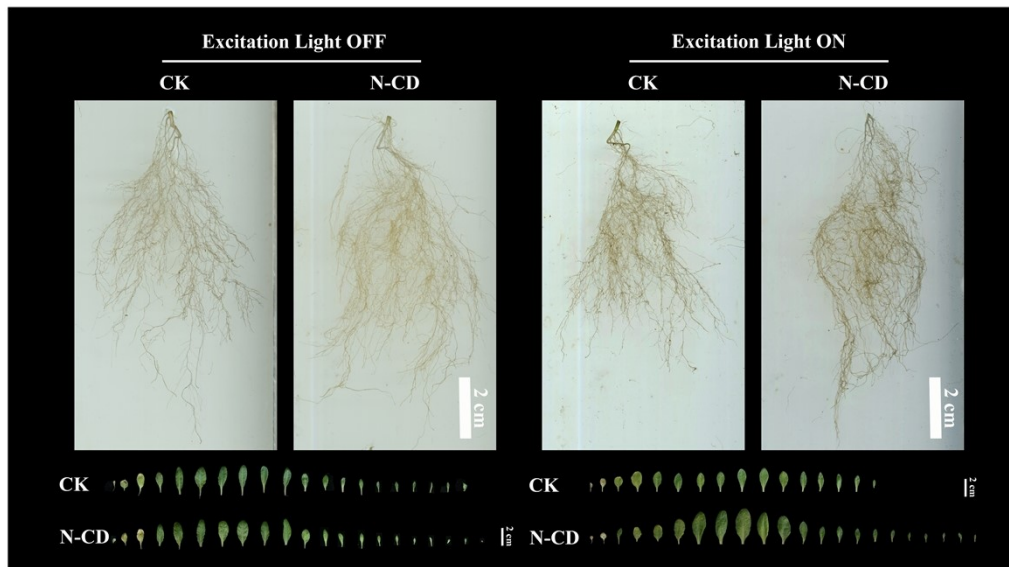

**Fig. S4** Effects of N-CDs on root development and leaf growth for 20 days treatment in *Arabidopsis*.

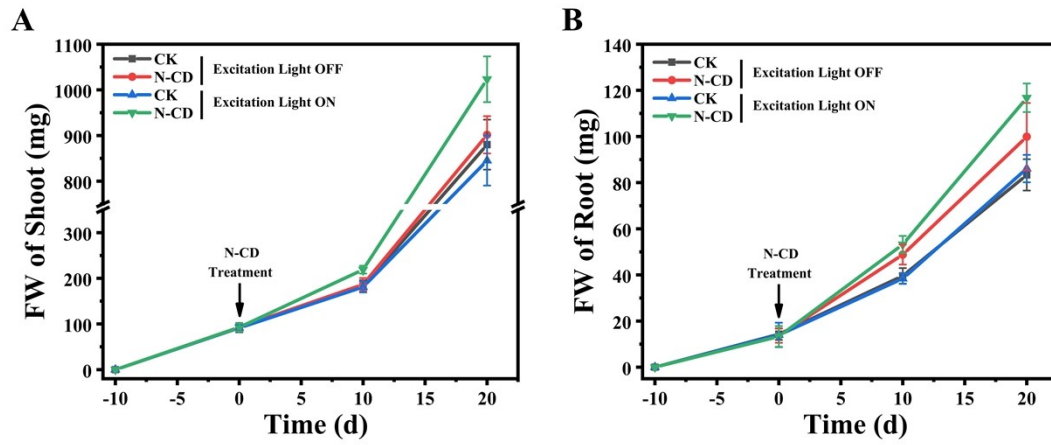

**Fig. S5** The fresh weights of shoot (A) and root (B) of N-CD-treated seedlings at different time with or without excitation light.

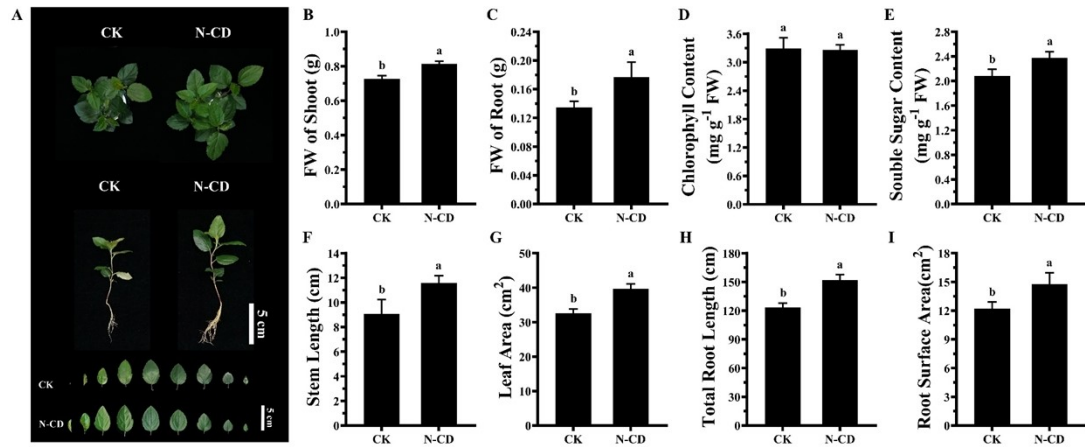

**Fig. S6** Effects of N-CDs on improving the growth of *Malus Hupehensis* in the presence of excitation light. (A) Effects of N-CDs (300 mg L<sup>-1</sup>) on the *M. Hupehensis* seedlings on the enhancement of under light illumination (20.4267  $\mu\text{mol m}^{-2} \text{s}^{-1}$ ) with excitation light ( $\lambda_{\text{max}} = 365 \text{ nm}$ , 0.8325  $\mu\text{mol m}^{-2} \text{s}^{-1}$ ). Pictures captured after 30 days of cultivation. (B-I) Fresh weight of shoot (B), fresh weight of root (C), chlorophyll content (D), soluble sugar content (E), stem length (F), leaf area (G), total root length (H), root surface area (I) of all treatments. All data ( $n \geq 3$ ) were analyzed by one-way ANOVA, the different letters represent significant differences ( $P < 0.05$ , Tukey test).

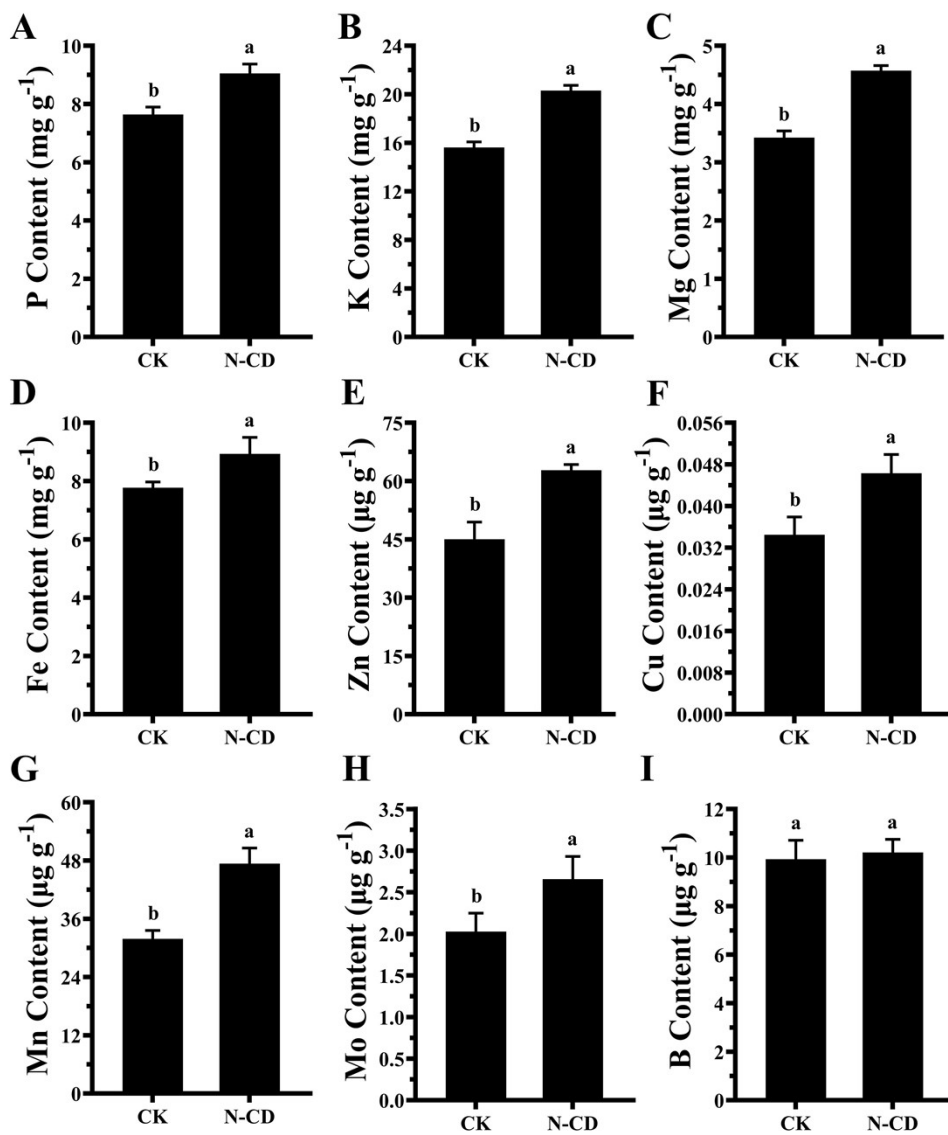

**Fig. S7** Effects of N-CDs on promoting the absorption of nutrients of *M. Hupehensis* in the presence of excitation light. All data ( $n \geq 3$ ) were analyzed by one-way ANOVA, the different letters represent significant differences ( $P < 0.05$ , Tukey test).



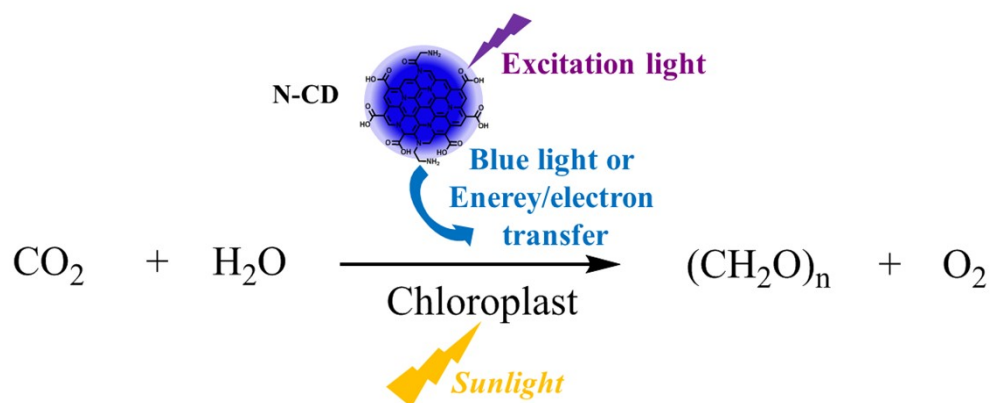

**Fig. S8** The chemical formula of N-CD-induced plant growth and photosynthesis enhancement.

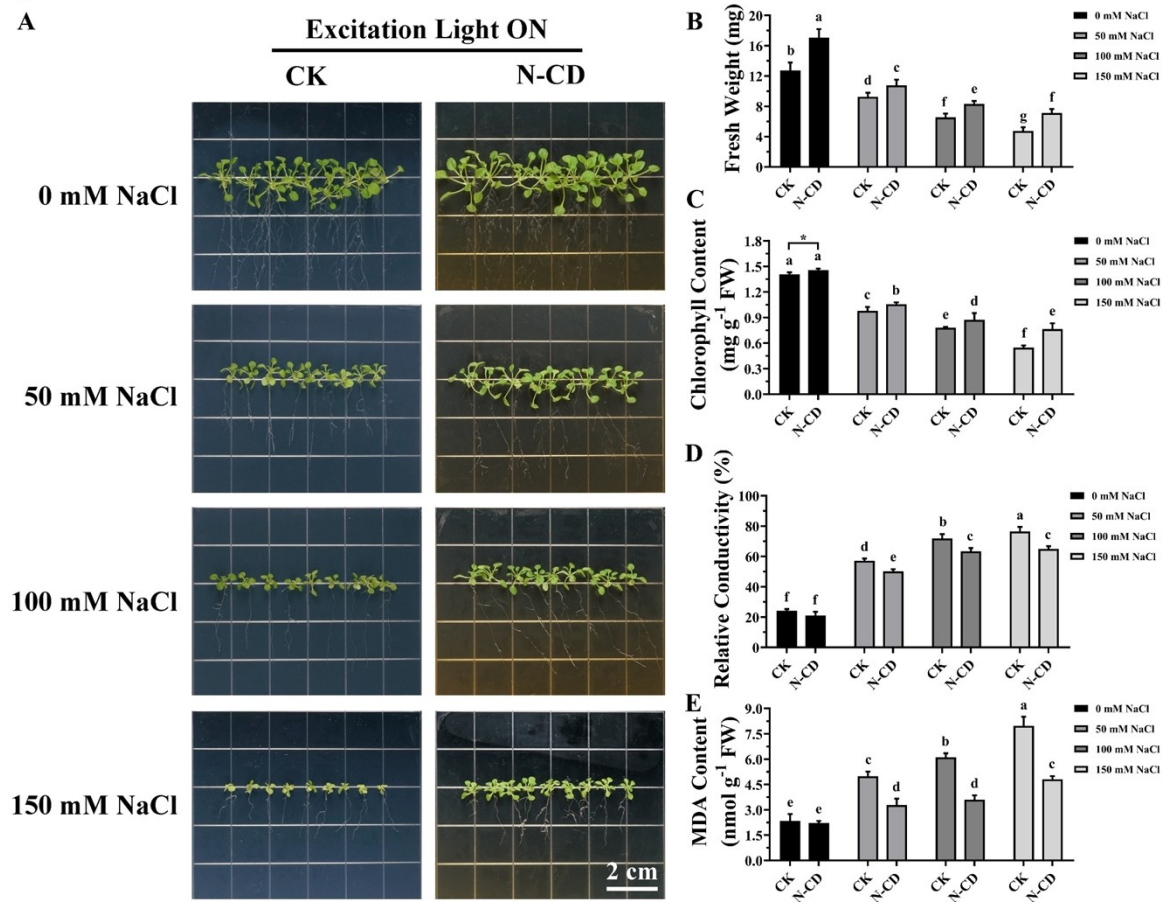

**Fig. S9** Effects of N-CDs in alleviating salt stress in the presence of excitation light. (A) Effects of N-CDs (300 mg L<sup>-1</sup>) on the *Arabidopsis* seedlings in the mitigation of salt stress under light illumination (20.4267  $\mu\text{mol m}^{-2} \text{s}^{-1}$ ) with excitation light ( $\lambda_{\text{max}} = 365 \text{ nm}$ , 0.8325  $\mu\text{mol m}^{-2} \text{s}^{-1}$ ). Pictures captured after 14 days of cultivation. (B-E) Fresh weight (B), chlorophyll content (C), relative conductivity (D), MDA content (E) of all treatments. All data ( $n \geq 3$ ) were analyzed by one-way ANOVA, the different letters represent significant differences ( $P < 0.05$ , LSD test).

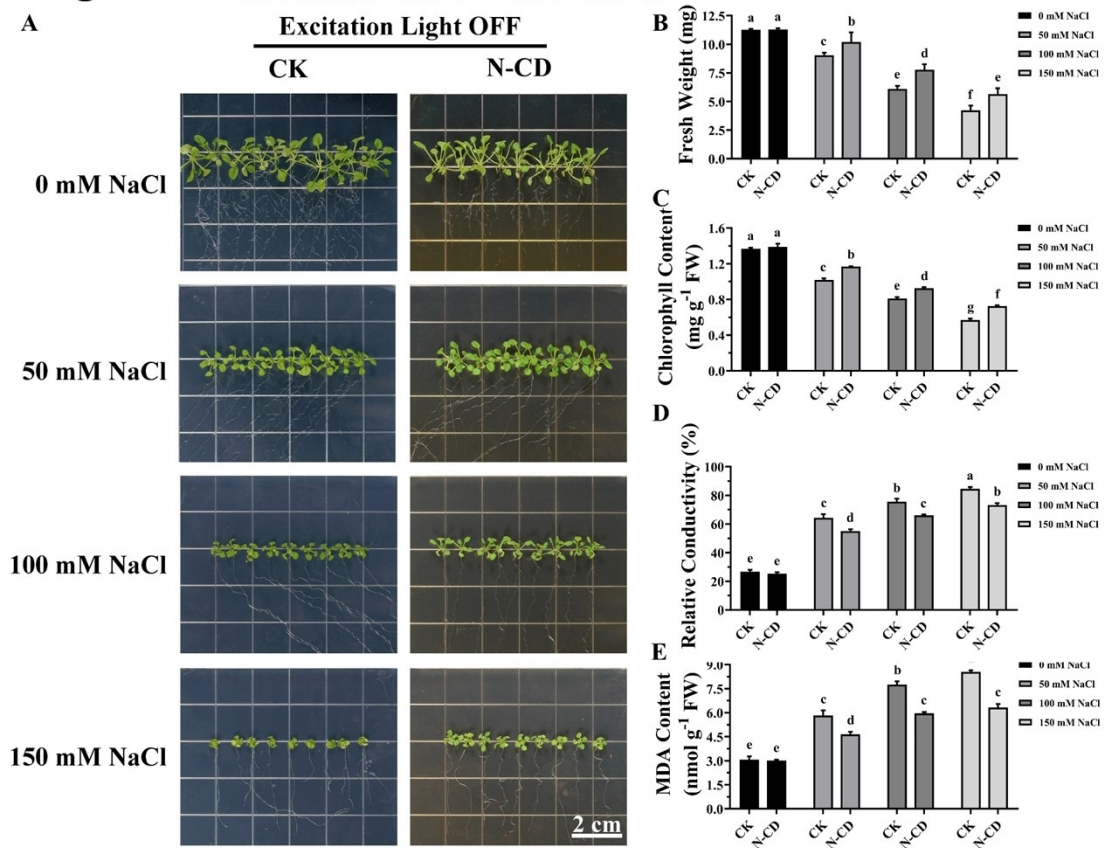

**Fig. S10** Effects of N-CDs in alleviating salt stress in the absence of excitation light. (A) Effects of N-CDs (300 mg L<sup>-1</sup>) on the *Arabidopsis* seedlings in the mitigation of salt stress under light illumination (20.4267 μmol m<sup>-2</sup> s<sup>-1</sup>). Pictures captured after 14 days of cultivation. (B-E) Fresh weight (B), chlorophyll content (C), relative conductivity (D), MDA content (E) of all treatments. All data (n ≥ 3) were analyzed by one-way ANOVA, the different letters represent significant differences ( $P < 0.05$ , LSD test).

**Table S1.** Hoagland nutrient solution.

|              | Nutritive Salt                                       | Concentration (g L <sup>-1</sup> ) | Amount of various stores<br>per 100 mL culture<br>solution (mL) |
|--------------|------------------------------------------------------|------------------------------------|-----------------------------------------------------------------|
| Macroelement | Ca(NO <sub>3</sub> ) <sub>2</sub> ·4H <sub>2</sub> O | 236                                | 0.5                                                             |
|              | KNO <sub>3</sub>                                     | 102                                |                                                                 |
|              | MgSO <sub>4</sub> ·7H <sub>2</sub> O                 | 98                                 |                                                                 |
|              | KH <sub>2</sub> PO <sub>4</sub>                      | 27                                 |                                                                 |
|              | EDTA-Na                                              | 7.45                               |                                                                 |
|              | FeSO <sub>4</sub> ·7H <sub>2</sub> O                 | 5.57                               |                                                                 |
| Microelement | H <sub>3</sub> BO <sub>4</sub>                       | 2.86                               | 0.1                                                             |
|              | MnCl <sub>2</sub> ·4H <sub>2</sub> O                 | 1.81                               |                                                                 |
|              | CuSO <sub>4</sub> ·5H <sub>2</sub> O                 | 0.08                               |                                                                 |
|              | ZnSO <sub>4</sub> ·7H <sub>2</sub> O                 | 0.22                               |                                                                 |
|              | H <sub>2</sub> MoO <sub>4</sub> ·H <sub>2</sub> O    | 0.09                               |                                                                 |

**Table S2.** Light intensity of different wavelengths of light in seedling growth

| Parameters | Light conditions with<br>excitation light ( $\mu\text{mol m}^{-2} \text{s}^{-1}$ ) | Light conditions without<br>excitation light ( $\mu\text{mol m}^{-2} \text{s}^{-1}$ ) |
|------------|------------------------------------------------------------------------------------|---------------------------------------------------------------------------------------|
| PPFD       | 20.4267                                                                            | 20.3524                                                                               |
| PPFD-UV    | 0.8325                                                                             | 0.0207                                                                                |
| PPFD-B     | 4.9127                                                                             | 4.7881                                                                                |
| PPFD-G     | 6.2135                                                                             | 6.2561                                                                                |
| PPFD-R     | 9.30                                                                               | 9.31                                                                                  |
| PPFD-FR    | 1.63032                                                                            | 1.59390                                                                               |
| PPFD-IR    | 0.20935                                                                            | 0.22377                                                                               |

**Table S3.** The F-test ANOVA of Fig. 3.

| <b>Analysis of Variance Table (Fig. 3)</b>               |                             |             |           |             |          |                |
|----------------------------------------------------------|-----------------------------|-------------|-----------|-------------|----------|----------------|
|                                                          | <b>Sources of variation</b> | <b>SS</b>   | <b>df</b> | <b>MS</b>   | <b>F</b> | <b>p-value</b> |
| <b>Fig. 3B</b><br><b>FW of Shoot</b>                     | Between-processing          | 179656.7583 | 3         | 59885.5861  | 23.562   | 0.0001         |
|                                                          | Within-processing           | 91497.2574  | 36        | 2541.5905   |          |                |
|                                                          | Total variation             | 271154.0157 | 39        |             |          |                |
| <b>Fig. 3C</b><br><b>FW of Root</b>                      | Between-processing          | 7040.5168   | 3         | 2346.8389   | 28.099   | 0.0001         |
|                                                          | Within-processing           | 3006.7167   | 36        | 83.5199     |          |                |
|                                                          | Total variation             | 10047.2335  | 39        |             |          |                |
| <b>Fig. 3D</b><br><b>DW of Shoot</b>                     | Between-processing          | 325.4975    | 3         | 108.4992    | 16.13    | 0.0001         |
|                                                          | Within-processing           | 107.6253    | 16        | 6.7266      |          |                |
|                                                          | Total variation             | 433.1228    | 19        |             |          |                |
| <b>Fig. 3E</b><br><b>DW of Root</b>                      | Between-processing          | 20.5571     | 3         | 6.8524      | 18.167   | 0.0001         |
|                                                          | Within-processing           | 6.0352      | 16        | 0.3772      |          |                |
|                                                          | Total variation             | 26.5923     | 19        |             |          |                |
| <b>Fig. 3F</b><br><b>Chlorophyll</b><br><b>Content</b>   | Between-processing          | 0.0157      | 3         | 0.0052      | 3.285    | 0.0793         |
|                                                          | Within-processing           | 0.0128      | 8         | 0.0016      |          |                |
|                                                          | Total variation             | 0.0285      | 11        |             |          |                |
| <b>Fig. 3G</b><br><b>Soluble Sugar</b><br><b>Content</b> | Between-processing          | 1.7807      | 3         | 0.5936      | 59.282   | 0.0001         |
|                                                          | Within-processing           | 0.0801      | 8         | 0.01        |          |                |
|                                                          | Total variation             | 1.8608      | 11        |             |          |                |
| <b>Fig. 3H</b><br><b>Leaf Area</b>                       | Between-processing          | 70.5508     | 3         | 23.5169     | 6.506    | 0.0044         |
|                                                          | Within-processing           | 57.8312     | 16        | 3.6144      |          |                |
|                                                          | Total variation             | 128.382     | 19        |             |          |                |
| <b>Fig. 3I</b><br><b>Leaf Number</b>                     | Between-processing          | 125.35      | 3         | 41.7833     | 10.714   | 0.0004         |
|                                                          | Within-processing           | 62.4        | 16        | 3.9         |          |                |
|                                                          | Total variation             | 187.75      | 19        |             |          |                |
| <b>Fig. 3J</b><br><b>Total Root</b><br><b>Length</b>     | Between-processing          | 112589.3877 | 3         | 37529.7959  | 62.432   | 0.0001         |
|                                                          | Within-processing           | 21640.772   | 36        | 601.1326    |          |                |
|                                                          | Total variation             | 134230.1596 | 39        |             |          |                |
| <b>Fig. 3K</b><br><b>Root Tips</b>                       | Between-processing          | 21191170.22 | 3         | 7063723.406 | 240.52   | 0.0001         |
|                                                          | Within-processing           | 1057268.225 | 36        | 29368.5618  |          |                |
|                                                          | Total variation             | 22248438.44 | 39        |             |          |                |

**Table S4.** The F-test ANOVA of Fig. 4.

| <b>Analysis of Variance Table (Fig. 4)</b>           |                             |             |           |             |          |                |
|------------------------------------------------------|-----------------------------|-------------|-----------|-------------|----------|----------------|
|                                                      | <b>Sources of variation</b> | <b>SS</b>   | <b>df</b> | <b>MS</b>   | <b>F</b> | <b>p-value</b> |
| <b>Fig. 4C</b><br><b>FW of Rosette Leaf</b>          | Between-processing          | 394672.5604 | 3         | 131557.5201 | 563.067  | 0.0001         |
|                                                      | Within-processing           | 3738.3104   | 16        | 233.6444    |          |                |
|                                                      | Total variation             | 398410.8708 | 19        |             |          |                |
| <b>Fig. 4D</b><br><b>FW of Root</b>                  | Between-processing          | 16267.9897  | 3         | 5422.6632   | 350.837  | 0.0001         |
|                                                      | Within-processing           | 247.302     | 16        | 15.4564     |          |                |
|                                                      | Total variation             | 16515.2917  | 19        |             |          |                |
| <b>Fig. 4E</b><br><b>F<sub>v</sub>/F<sub>m</sub></b> | Between-processing          | 0.0083      | 3         | 0.0028      | 55.111   | 0.0001         |
|                                                      | Within-processing           | 0.0004      | 8         | 0.0001      |          |                |
|                                                      | Total variation             | 0.0087      | 11        |             |          |                |
| <b>Fig. 4F</b><br><b>Chlorophyll Content</b>         | Between-processing          | 0.4832      | 3         | 0.1611      | 270.11   | 0.0001         |
|                                                      | Within-processing           | 0.0048      | 8         | 0.0006      |          |                |
|                                                      | Total variation             | 0.488       | 11        |             |          |                |
| <b>Fig. 4G</b><br><b>MDA Content</b>                 | Between-processing          | 735.1777    | 3         | 245.0592    | 653.099  | 0.0001         |
|                                                      | Within-processing           | 3.0018      | 8         | 0.3752      |          |                |
|                                                      | Total variation             | 738.1795    | 11        |             |          |                |
| <b>Fig. 4H</b><br><b>Relative Conductivity</b>       | Between-processing          | 8759.2454   | 3         | 2919.7485   | 1498.909 | 0.0001         |
|                                                      | Within-processing           | 15.5833     | 8         | 1.9479      |          |                |
|                                                      | Total variation             | 8774.8287   | 11        |             |          |                |

**Table S5.** The F-test ANOVA of Fig. 5.

| <b>Analysis of Variance Table (Fig. 5)</b>     |                             |             |           |             |          |                |
|------------------------------------------------|-----------------------------|-------------|-----------|-------------|----------|----------------|
|                                                | <b>Sources of variation</b> | <b>SS</b>   | <b>df</b> | <b>MS</b>   | <b>F</b> | <b>p-value</b> |
| <b>Fig. 5C</b><br><b>FW of Rosette Leaf</b>    | Between-processing          | 439871.1375 | 3         | 146623.7125 | 1092.017 | 0.0001         |
|                                                | Within-processing           | 2148.3      | 16        | 134.2688    |          |                |
|                                                | Total variation             | 442019.4375 | 19        |             |          |                |
| <b>Fig. 5D</b><br><b>FW of Root</b>            | Between-processing          | 20165.2     | 3         | 6721.7333   | 412.376  | 0.0001         |
|                                                | Within-processing           | 260.8       | 16        | 16.3        |          |                |
|                                                | Total variation             | 20426       | 19        |             |          |                |
| <b>Fig. 5E</b><br><b>Fv/Fm</b>                 | Between-processing          | 0.009       | 3         | 0.003       | 44.792   | 0.0001         |
|                                                | Within-processing           | 0.0005      | 8         | 0.0001      |          |                |
|                                                | Total variation             | 0.0095      | 11        |             |          |                |
| <b>Fig. 5F</b><br><b>Chlorophyll Content</b>   | Between-processing          | 1.0672      | 3         | 0.3557      | 152.326  | 0.0001         |
|                                                | Within-processing           | 0.0187      | 8         | 0.0023      |          |                |
|                                                | Total variation             | 1.0859      | 11        |             |          |                |
| <b>Fig. 5G</b><br><b>MDA Content</b>           | Between-processing          | 539.1376    | 3         | 179.7125    | 125.201  | 0.0001         |
|                                                | Within-processing           | 11.4831     | 8         | 1.4354      |          |                |
|                                                | Total variation             | 550.6208    | 11        |             |          |                |
| <b>Fig. 5H</b><br><b>Relative Conductivity</b> | Between-processing          | 8461.9476   | 3         | 2820.6492   | 2357.734 | 0.0001         |
|                                                | Within-processing           | 9.5707      | 8         | 1.1963      |          |                |
|                                                | Total variation             | 8471.5184   | 11        |             |          |                |



**Table S6.** The F-test ANOVA of Fig. S6.

| <b>Analysis of Variance Table (Fig. S6)</b>     |                             |           |           |           |          |                |
|-------------------------------------------------|-----------------------------|-----------|-----------|-----------|----------|----------------|
|                                                 | <b>Sources of variation</b> | <b>SS</b> | <b>df</b> | <b>MS</b> | <b>F</b> | <b>p-value</b> |
| <b>Fig. S6B</b><br><b>FW of Shoot</b>           | Between-processing          | 0.011     | 1         | 0.011     | 41.514   | 0.003          |
|                                                 | Within-processing           | 0.0011    | 4         | 0.0003    |          |                |
|                                                 | Total variation             | 0.0121    | 5         |           |          |                |
| <b>Fig. S6C</b><br><b>FW of Root</b>            | Between-processing          | 0.0027    | 1         | 0.0027    | 10.257   | 0.0328         |
|                                                 | Within-processing           | 0.001     | 4         | 0.0003    |          |                |
|                                                 | Total variation             | 0.0037    | 5         |           |          |                |
| <b>Fig. S6D</b><br><b>Chlorophyll Content</b>   | Between-processing          | 0.0018    | 1         | 0.0018    | 0.06     | 0.8192         |
|                                                 | Within-processing           | 0.1211    | 4         | 0.0303    |          |                |
|                                                 | Total variation             | 0.1229    | 5         |           |          |                |
| <b>Fig. S6E</b><br><b>Soluble Sugar Content</b> | Between-processing          | 0.2144    | 1         | 0.2144    | 19.552   | 0.0022         |
|                                                 | Within-processing           | 0.0877    | 8         | 0.011     |          |                |
|                                                 | Total variation             | 0.3021    | 9         |           |          |                |
| <b>Fig. S6F</b><br><b>Stem Length</b>           | Between-processing          | 15.6763   | 1         | 15.6763   | 18.198   | 0.0027         |
|                                                 | Within-processing           | 6.8913    | 8         | 0.8614    |          |                |
|                                                 | Total variation             | 22.5676   | 9         |           |          |                |
| <b>Fig. S6G</b><br><b>Leaf Area</b>             | Between-processing          | 125.6029  | 1         | 125.603   | 79.072   | 0.0001         |
|                                                 | Within-processing           | 12.7077   | 8         | 1.5885    |          |                |
|                                                 | Total variation             | 138.3106  | 9         |           |          |                |
| <b>Fig. S6H</b><br><b>Total Root Length</b>     | Between-processing          | 2025.5239 | 1         | 2025.52   | 83.907   | 0.0001         |
|                                                 | Within-processing           | 193.1205  | 8         | 24.1401   |          |                |
|                                                 | Total variation             | 2218.6444 | 9         |           |          |                |
| <b>Fig. S6I</b><br><b>Root Surface Area</b>     | Between-processing          | 16.4771   | 1         | 16.4771   | 18.14    | 0.0028         |
|                                                 | Within-processing           | 7.2664    | 8         | 0.9083    |          |                |
|                                                 | Total variation             | 23.7435   | 9         |           |          |                |

**Table S7.** The F-test ANOVA of Fig. S7.

| Analysis of Variance Table (Fig. S7) |                      |          |    |          |         |         |
|--------------------------------------|----------------------|----------|----|----------|---------|---------|
|                                      | Sources of variation | SS       | df | MS       | F       | p-value |
| <b>Fig. S7A</b><br><b>P Content</b>  | Between-processing   | 2.9816   | 1  | 2.9816   | 34.978  | 0.0041  |
|                                      | Within-processing    | 0.341    | 4  | 0.0852   |         |         |
|                                      | Total variation      | 3.3226   | 5  |          |         |         |
| <b>Fig. S7B</b><br><b>K Content</b>  | Between-processing   | 33.0111  | 1  | 33.0111  | 165.439 | 0.0002  |
|                                      | Within-processing    | 0.7981   | 4  | 0.1995   |         |         |
|                                      | Total variation      | 33.8092  | 5  |          |         |         |
| <b>Fig. S7C</b><br><b>Mg Content</b> | Between-processing   | 1.9717   | 1  | 1.9717   | 192.754 | 0.0002  |
|                                      | Within-processing    | 0.0409   | 4  | 0.0102   |         |         |
|                                      | Total variation      | 2.0126   | 5  |          |         |         |
| <b>Fig. S7D</b><br><b>Fe Content</b> | Between-processing   | 2.0169   | 1  | 2.0169   | 11.249  | 0.0285  |
|                                      | Within-processing    | 0.7172   | 4  | 0.1793   |         |         |
|                                      | Total variation      | 2.7341   | 5  |          |         |         |
| <b>Fig. S7E</b><br><b>Zn Content</b> | Between-processing   | 471.4483 | 1  | 471.4483 | 44.165  | 0.0027  |
|                                      | Within-processing    | 42.6993  | 4  | 10.6748  |         |         |
|                                      | Total variation      | 514.1476 | 5  |          |         |         |
| <b>Fig. S7F</b><br><b>Cu Content</b> | Between-processing   | 0.0002   | 1  | 0.0002   | 16.971  | 0.0146  |
|                                      | Within-processing    | 0        | 4  | 0        |         |         |
|                                      | Total variation      | 0.0003   | 5  |          |         |         |
| <b>Fig. S7G</b><br><b>Mn Content</b> | Between-processing   | 360.4139 | 1  | 360.4139 | 54.612  | 0.0018  |
|                                      | Within-processing    | 26.3981  | 4  | 6.5995   |         |         |
|                                      | Total variation      | 386.812  | 5  |          |         |         |
| <b>Fig. S7H</b><br><b>Mo Content</b> | Between-processing   | 0.5925   | 1  | 0.5925   | 9.62    | 0.0362  |
|                                      | Within-processing    | 0.2464   | 4  | 0.0616   |         |         |
|                                      | Total variation      | 0.8389   | 5  |          |         |         |
| <b>Fig. S7I</b><br><b>B Content</b>  | Between-processing   | 0.116    | 1  | 0.116    | 0.255   | 0.6403  |
|                                      | Within-processing    | 1.8211   | 4  | 0.4553   |         |         |
|                                      | Total variation      | 1.937    | 5  |          |         |         |

**Table S8.** The F-test ANOVA of Fig. S9.

| Analysis of Variance Table (Fig. S9)            |                      |           |    |           |         |         |
|-------------------------------------------------|----------------------|-----------|----|-----------|---------|---------|
|                                                 | Sources of variation | SS        | df | MS        | F       | p-value |
| <b>Fig. S9B</b><br><b>Fresh Weight</b>          | Between-processing   | 537.1804  | 7  | 76.7401   | 147.101 | 0.0001  |
|                                                 | Within-processing    | 16.6938   | 32 | 0.5217    |         |         |
|                                                 | Total variation      | 553.8742  | 39 |           |         |         |
| <b>Fig. S9C</b><br><b>Chlorophyll Content</b>   | Between-processing   | 2.1022    | 7  | 0.3003    | 159.463 | 0.0001  |
|                                                 | Within-processing    | 0.0301    | 16 | 0.0019    |         |         |
|                                                 | Total variation      | 2.1323    | 23 |           |         |         |
| <b>Fig. S9D</b><br><b>Relative Conductivity</b> | Between-processing   | 9100.4014 | 7  | 1300.0573 | 291.151 | 0.0001  |
|                                                 | Within-processing    | 71.4438   | 16 | 4.4652    |         |         |
|                                                 | Total variation      | 9171.8452 | 23 |           |         |         |
| <b>Fig. S9E</b><br><b>MDA Content</b>           | Between-processing   | 81.175    | 7  | 11.5964   | 108.721 | 0.0001  |
|                                                 | Within-processing    | 1.7066    | 16 | 0.1067    |         |         |
|                                                 | Total variation      | 82.8816   | 23 |           |         |         |

**Table S9.** The F-test ANOVA of Fig. S10.

| <b>Analysis of Variance Table (Fig. S10)</b>     |                             |            |           |           |          |                |
|--------------------------------------------------|-----------------------------|------------|-----------|-----------|----------|----------------|
|                                                  | <b>Sources of variation</b> | <b>SS</b>  | <b>df</b> | <b>MS</b> | <b>F</b> | <b>p-value</b> |
| <b>Fig. S10B</b><br><b>Fresh Weight</b>          | Between-processing          | 252.5388   | 7         | 36.077    | 191.028  | 0.0001         |
|                                                  | Within-processing           | 6.0434     | 32        | 0.1889    |          |                |
|                                                  | Total variation             | 258.5822   | 39        |           |          |                |
| <b>Fig. S10C</b><br><b>Chlorophyll Content</b>   | Between-processing          | 1.8501     | 7         | 0.2643    | 774.916  | 0.0001         |
|                                                  | Within-processing           | 0.0055     | 16        | 0.0003    |          |                |
|                                                  | Total variation             | 1.8556     | 23        |           |          |                |
| <b>Fig. S10D</b><br><b>Relative Conductivity</b> | Between-processing          | 10222.2473 | 7         | 1460.321  | 674.771  | 0.0001         |
|                                                  | Within-processing           | 34.6268    | 16        | 2.1642    |          |                |
|                                                  | Total variation             | 10256.874  | 23        |           |          |                |
| <b>Fig. S10E</b><br><b>MDA Content</b>           | Between-processing          | 83.9114    | 7         | 11.9873   | 326.93   | 0.0001         |
|                                                  | Within-processing           | 0.5867     | 16        | 0.0367    |          |                |
|                                                  | Total variation             | 84.4981    | 23        |           |          |                |
